# Supplementary material
Source: PubMed Central journal article supplement (PMC3160044)
Supplement: supp_tpc.111.085464_Wang_Supplemental_Data_Final.pdf [file supp_tpc.111.085464_Wang_Supplemental_Data_Final.pdf]

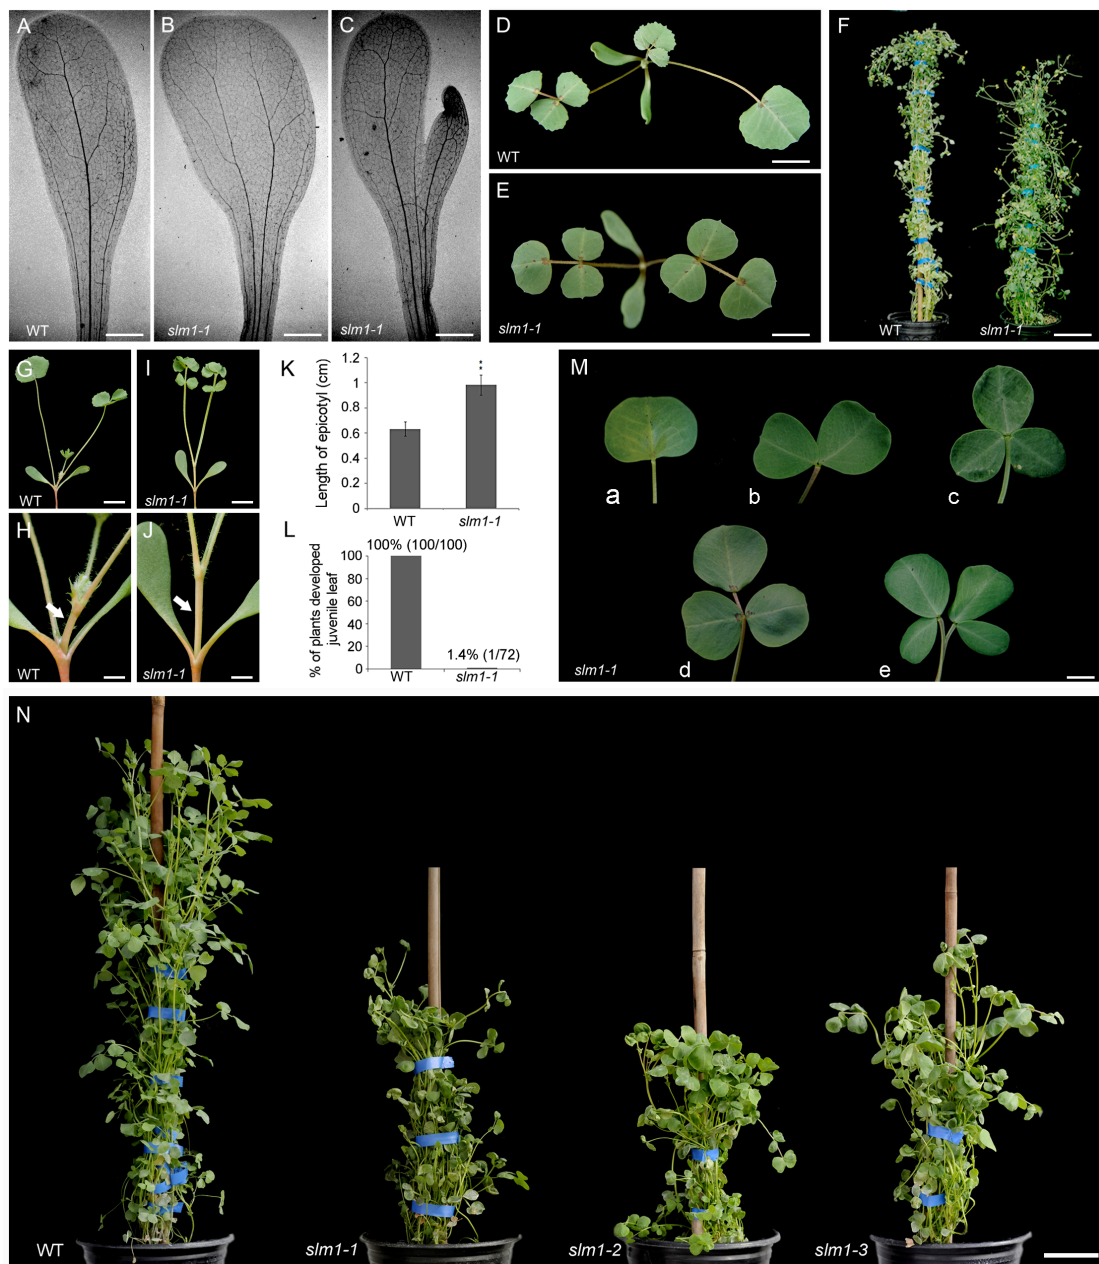

**Supplemental Figure 1.** Developmental Defects in the *slm1-1* Mutant of *M. truncatula*.

(A) to (C) Vein patterns of cotyledons in the wild type (WT; A) and *slm1-1* (B, C).

(D) and (E) Ten-day-old plants of the wild type (D) and *slm1-1* (E). In the wild type, a simple leaf (juvenile leaf) developed first, followed by two adult leaves (D). Note that the first true leaf did not develop, but two adult leaves were produced in the *slm1-1* mutant (E).

(F) Three-month-old plants at the reproductive stage of the wild type (left) and *slm1-1* (right).

**(G) to (J)** Length of epicotyls of the wild type (**G, H**) and *slm1-1* (**I, J**). Arrows indicate epicotyls.

**(K)** Length of epicotyls of the wild type and *slm1-1*. Asterisks indicate that the differences between the wild type and *slm1* are statistically significant at  $P < 0.01$ . Means  $\pm$  SE are shown (n=20).

**(L)** Percentage of first leaf initiation in the wild type and *slm1-1*.

**(M)** Phenotypic variation of adult leaves of *slm1-1*. a: a simple leaf with a single leaflet; b: two terminal leaflets developed on a single petiole; c: three terminal leaflets developed on a single petiole; d: one terminal leaflet and two lateral leaflets developed in a trifoliate form; e: two petioles fused together; two terminal leaflets developed on the distal end of each petiole, respectively; no lateral leaflets were produced.

**(N)** Fifty-day-old plants at the vegetative stage in the wild type, *slm1-1*, *slm1-2*, and *slm1-3*.

Bars = 10 cm in **(F)**, 5 cm in **(N)**, 5 mm in **(D)**, **(E)**, **(G)** to **(J)** and **(M)**, and 2 mm in **(A)** to **(C)**.

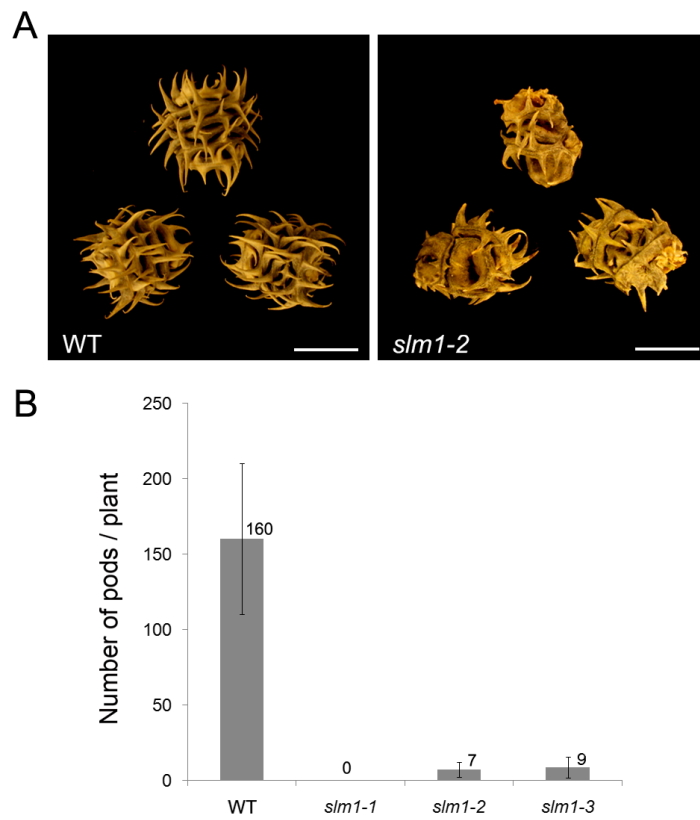

**Supplemental Figure 2.** Loss-of-function in *SLM1* Leads to Defects in Fertility.

**(A)** Seed pods of the wild type (left) and *slm1-2* (right).

**(B)** Seed pod production in the wild type and *slm1* alleles. Error bars represent SE (n =10).

Bars = 5 mm.

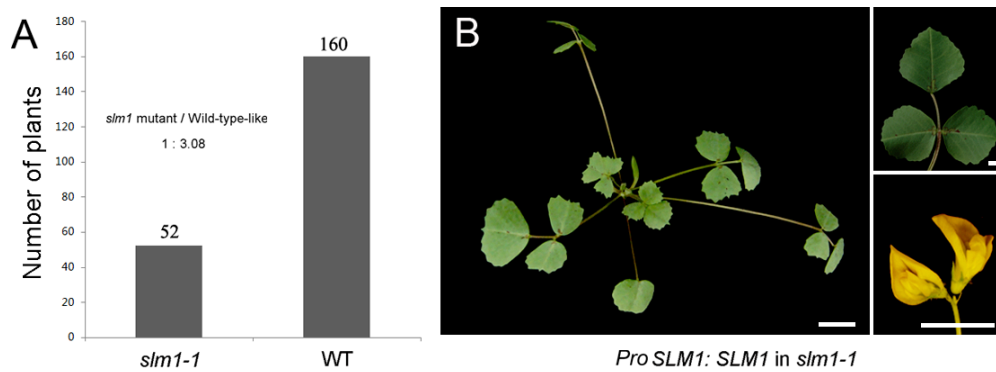

**Supplemental Figure 3.** Genetic Segregation Analysis and Genetic Complementation of the *slm1-1* Mutant.

(A) Number of wild-type-like and mutant plants obtained from a backcross F<sub>2</sub> population.

(B) A representative *slm1-1* line transformed with the *SLM1* genomic sequence (*ProSLM1:SLM1*) showed normal wild-type-like leaves and flowers.

Bars = 5 mm.

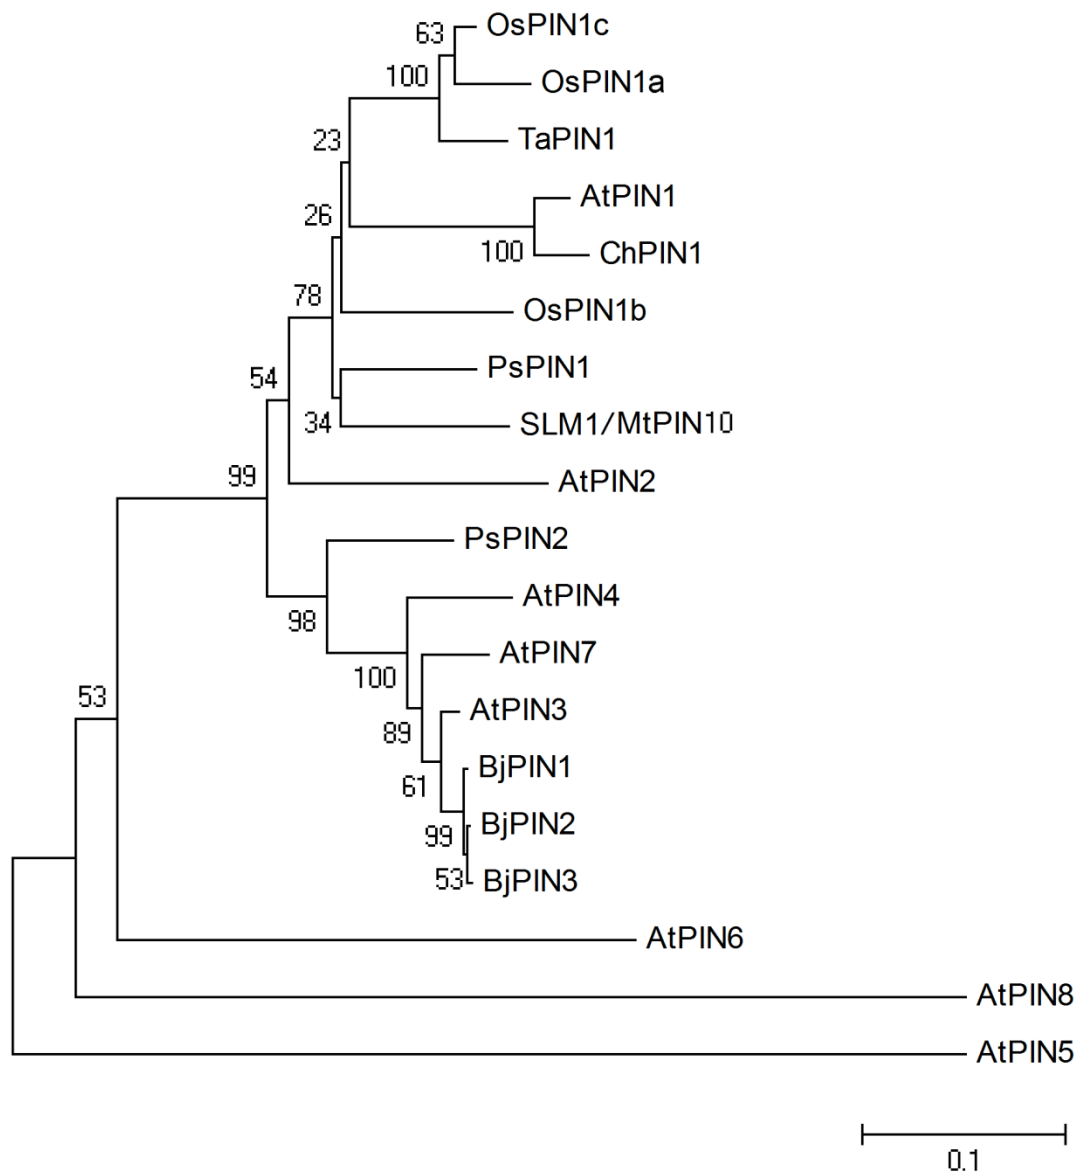

**Supplemental Figure 4.** Phylogenetic Analysis of SLM1/Mt PIN10 and PIN.

At PIN1 to At PIN8 from *Arabidopsis thaliana* (At); Ch PIN1 from *Cardamine hirsuta* (Ch); Ps PIN1 and Ps PIN2 from *Pisum sativum* (Ps); Ta PIN1 from *Triticum aestivum* (Ta); Os PIN1a, Os PIN1b, and Os PIN1c from *Oryza sativa* (Os); Bj PIN1 to Bj PIN3 from *Brassica juncea* (Bj). The scale bar indicates the genetic distance based on branch length.



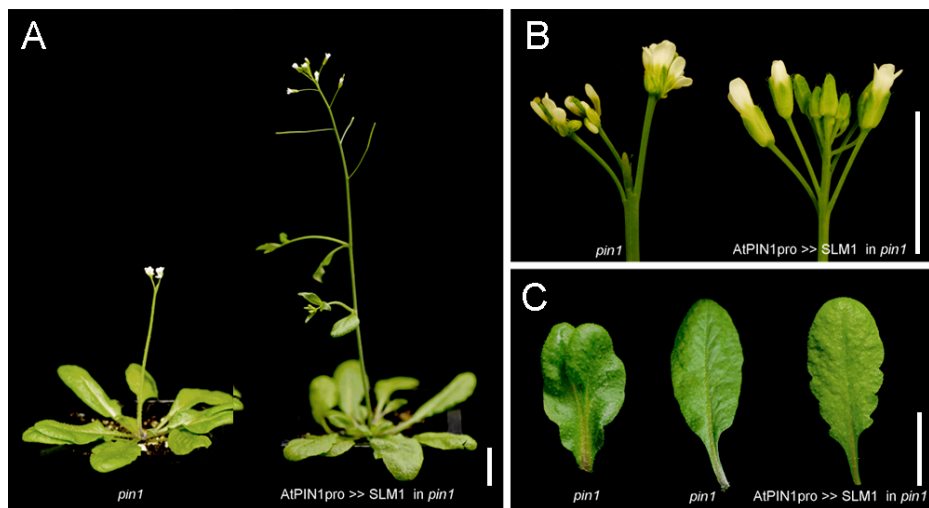

**Supplemental Figure 6. Genetic Complementation of the *Arabidopsis pin1* Mutant.**

The *Arabidopsis pin1* mutant was fully rescued by the *SLM1* CDS driven by the *Arabidopsis PIN1* promoter. The *Arabidopsis* mutant and complemented plants (A), flowers (B) and leaves (C) are shown.

Bars = 5 mm.

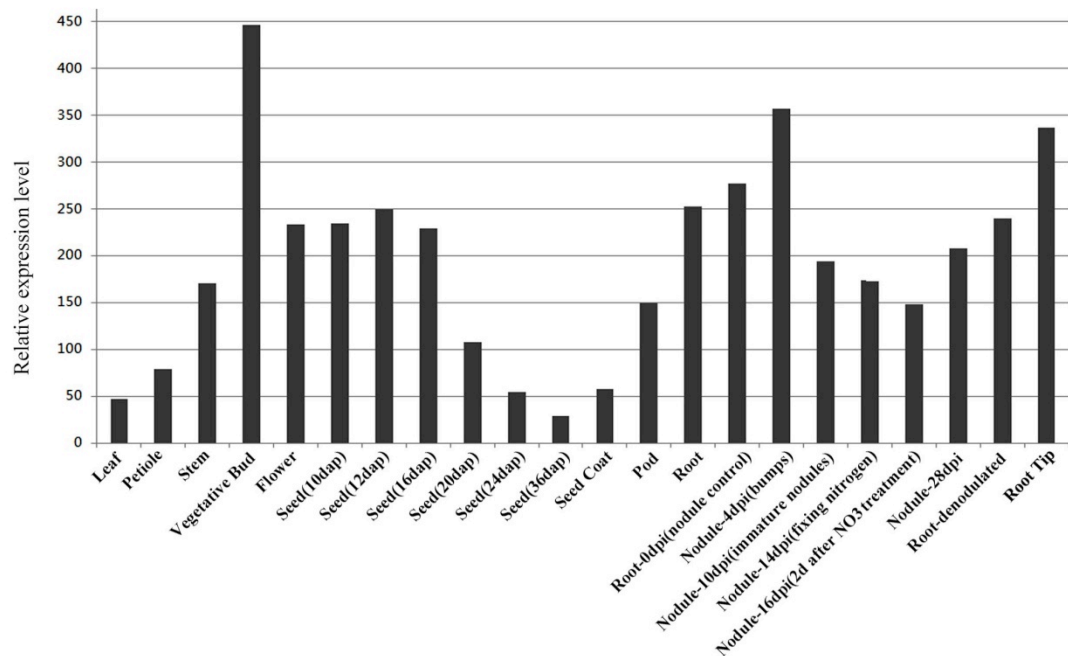

**Supplemental Figure 7.** Expression Profiling of the *SLM1* Transcript.

The data for *SLM1* (TC142052; probe set *Mtr.47942.1.S1*) are accessible at <http://bioinfo.noble.org/gene-atlas/>.



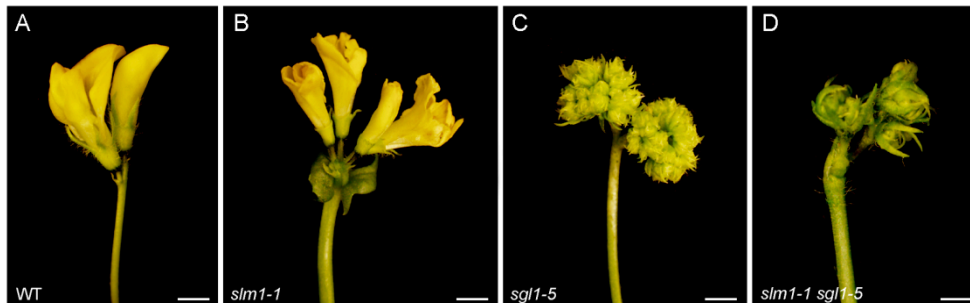

**Supplemental Figure 8.** Flower Phenotype of the Seventy-day-old Plants of Wild type and the Mutants Analyzed.

(A) Flowers of the wild type.

(B) Flowers of *slm1-1*.

(C) Flowers of *sgl1-5*.

(D) Flowers of *slm1-1 sgl1-5*.

Bars = 2 mm.

**Supplemental Table 1. Primers Used in This Study.**

| Primer     | Sequence                                  | Application                                                            |
|------------|-------------------------------------------|------------------------------------------------------------------------|
| cSLM1-F    | Forward-catgcatggaatgataagtgcttagac       | For cloning of the <i>SLM1</i> full length CDS                         |
| cSLM1-R    | Reverse-gtcgggttacctcaaagtccaataaaatgtag  |                                                                        |
| gSLM1-F    | Forward-cacctagatgatgtttgcggaatg          | For cloning of the <i>SLM1</i> promoter and genomic sequences          |
| gSLM1-R    | Reverse-gctcgtggcctctaccatagctag          |                                                                        |
| pSLM1-F    | Forward-cacctagatgatgtttgcggaatg          | For cloning of the <i>SLM1</i> promoter                                |
| pSLM1-R    | Reverse-gctcgtggcctctaccatagcta           |                                                                        |
| pAtPIN1-F  | Forward-ccggaattctaaattattccattggcgttgcgc | For cloning of the <i>AtPIN1</i> promoter                              |
| pAtPIN1-R  | Reverse-catgcatggctttgttcgccggagaagagagag |                                                                        |
| prbSGL1-F  | Forward-ttaccatggatcccgcacattca           | For cloning of the <i>SGL1</i> cDNA as probe for in situ hybridization |
| prbSGL1-R  | Reverse-ttggtggtatcgccggaagaaga           |                                                                        |
| prbSLM1-F  | Forward-tgcttcacctgtttctgaagggtg          | For cloning of the <i>SLM1</i> cDNA as probe for in situ hybridization |
| prbSLM1-R  | Reverse-ggaagagcagcctgtacaatagca          |                                                                        |
| DR5GUS-F   | Forward-cacctgcaggtcgacggatcgcga          | For cloning of the <i>DR5:GUS</i>                                      |
| DR5GUS-R   | Reverse-cgcgcgataatttatcctagtttgc         |                                                                        |
| qMtKNOX1-F | Forward-caaggttagaagaagcatgtgcaa          | For qRT-PCR analysis of <i>MtKNOX1</i>                                 |
| qMtKNOX1-R | Reverse-caacctgatccaactgcatctc            |                                                                        |
| qMtKNOX2-F | Forward-gagttgcattacaatggccatat           | For qRT-PCR analysis of <i>MtKNOX2</i>                                 |
| qMtKNOX2-R | Reverse-acctgttgactcagccaatgct            |                                                                        |
| qMtKNOX6-F | Forward-ttggtggagcaggcattaca              | For qRT-PCR analysis of <i>MtKNOX6</i>                                 |
| qMtKNOX6-R | Reverse-aagggtgcttttgggatt                |                                                                        |
| qSGL1-F    | Forward-gatgaacagcctttccagatt             | For qRT-PCR analysis of <i>SGL1</i>                                    |
| qSGL1-R    | Reverse-gatgccgtaacgctctccaa              |                                                                        |
| qPALM1-F   | Forward-ctcatccttcattcaccattcataaa        | For qRT-PCR analysis of <i>PALM1</i>                                   |
| qPALM1-R   | Reverse-gcacaatccagcattagcaaca            |                                                                        |
